# Supplementary material
Source: PubMed Central journal article supplement (PMC4328141)

# Figure S1

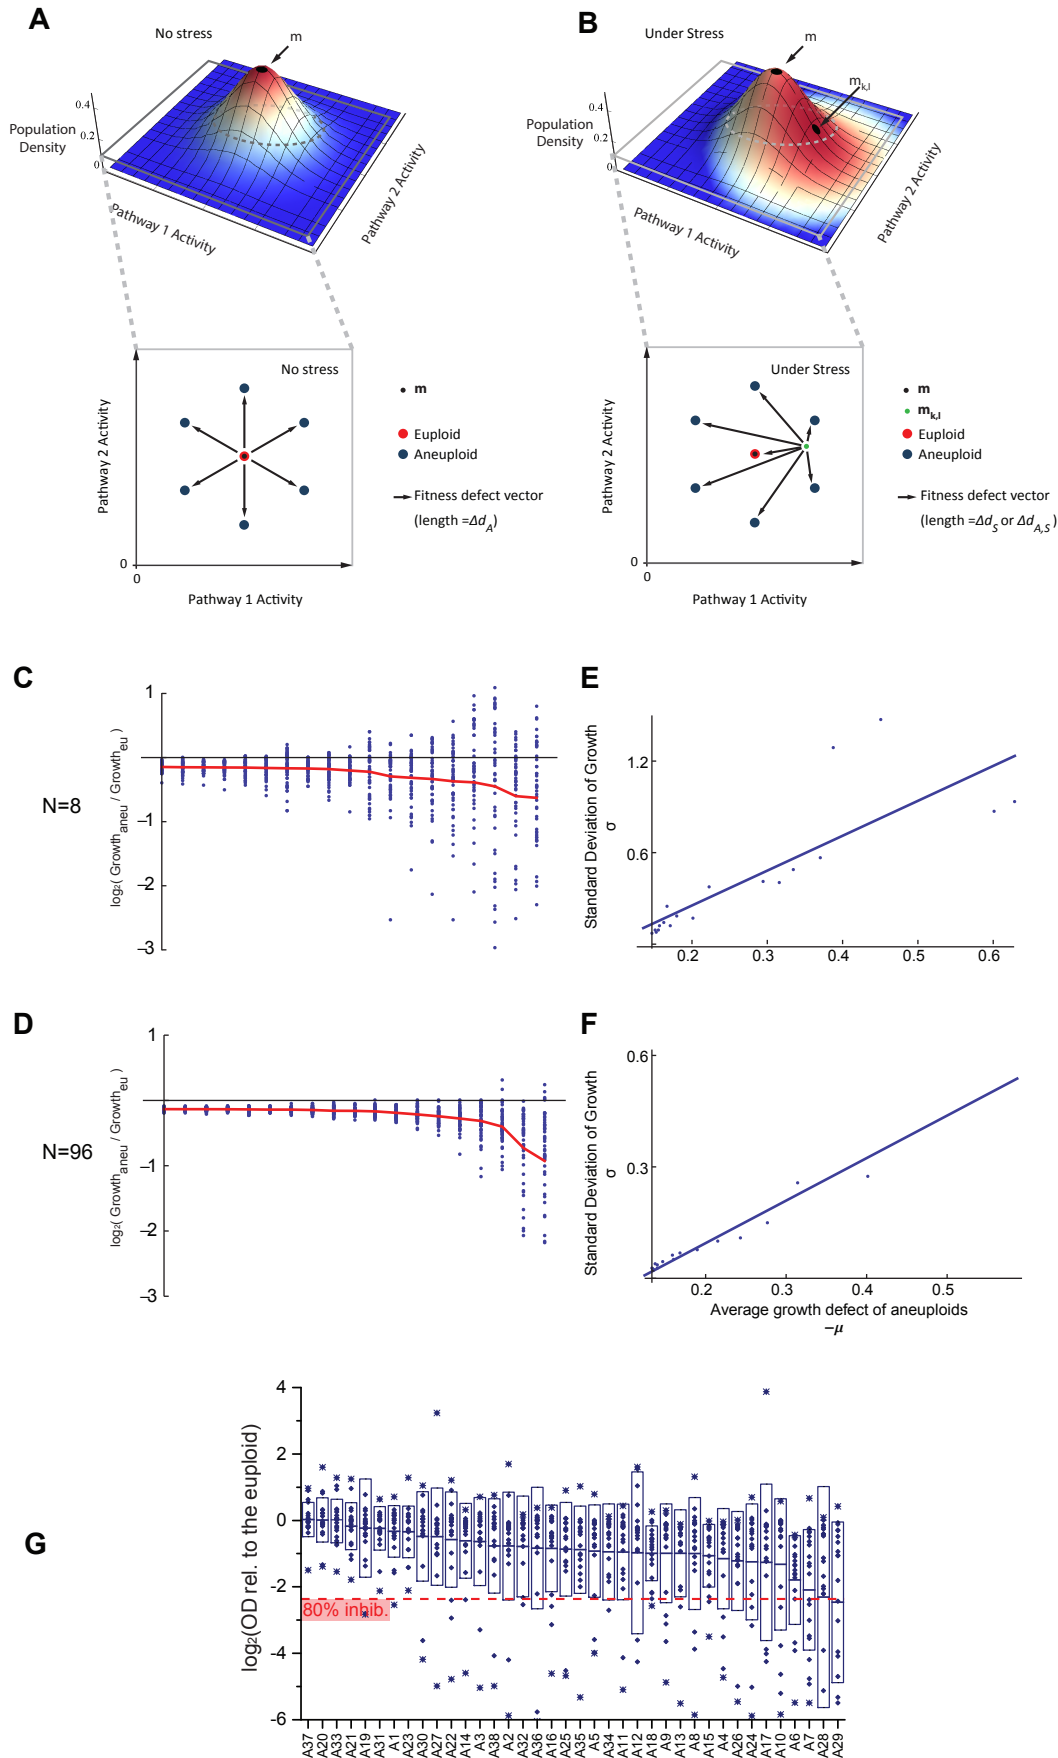

Supplement: NIHMS656944-supplement-2.pdf [file NIHMS656944-supplement-2.pdf]

# Figure S2

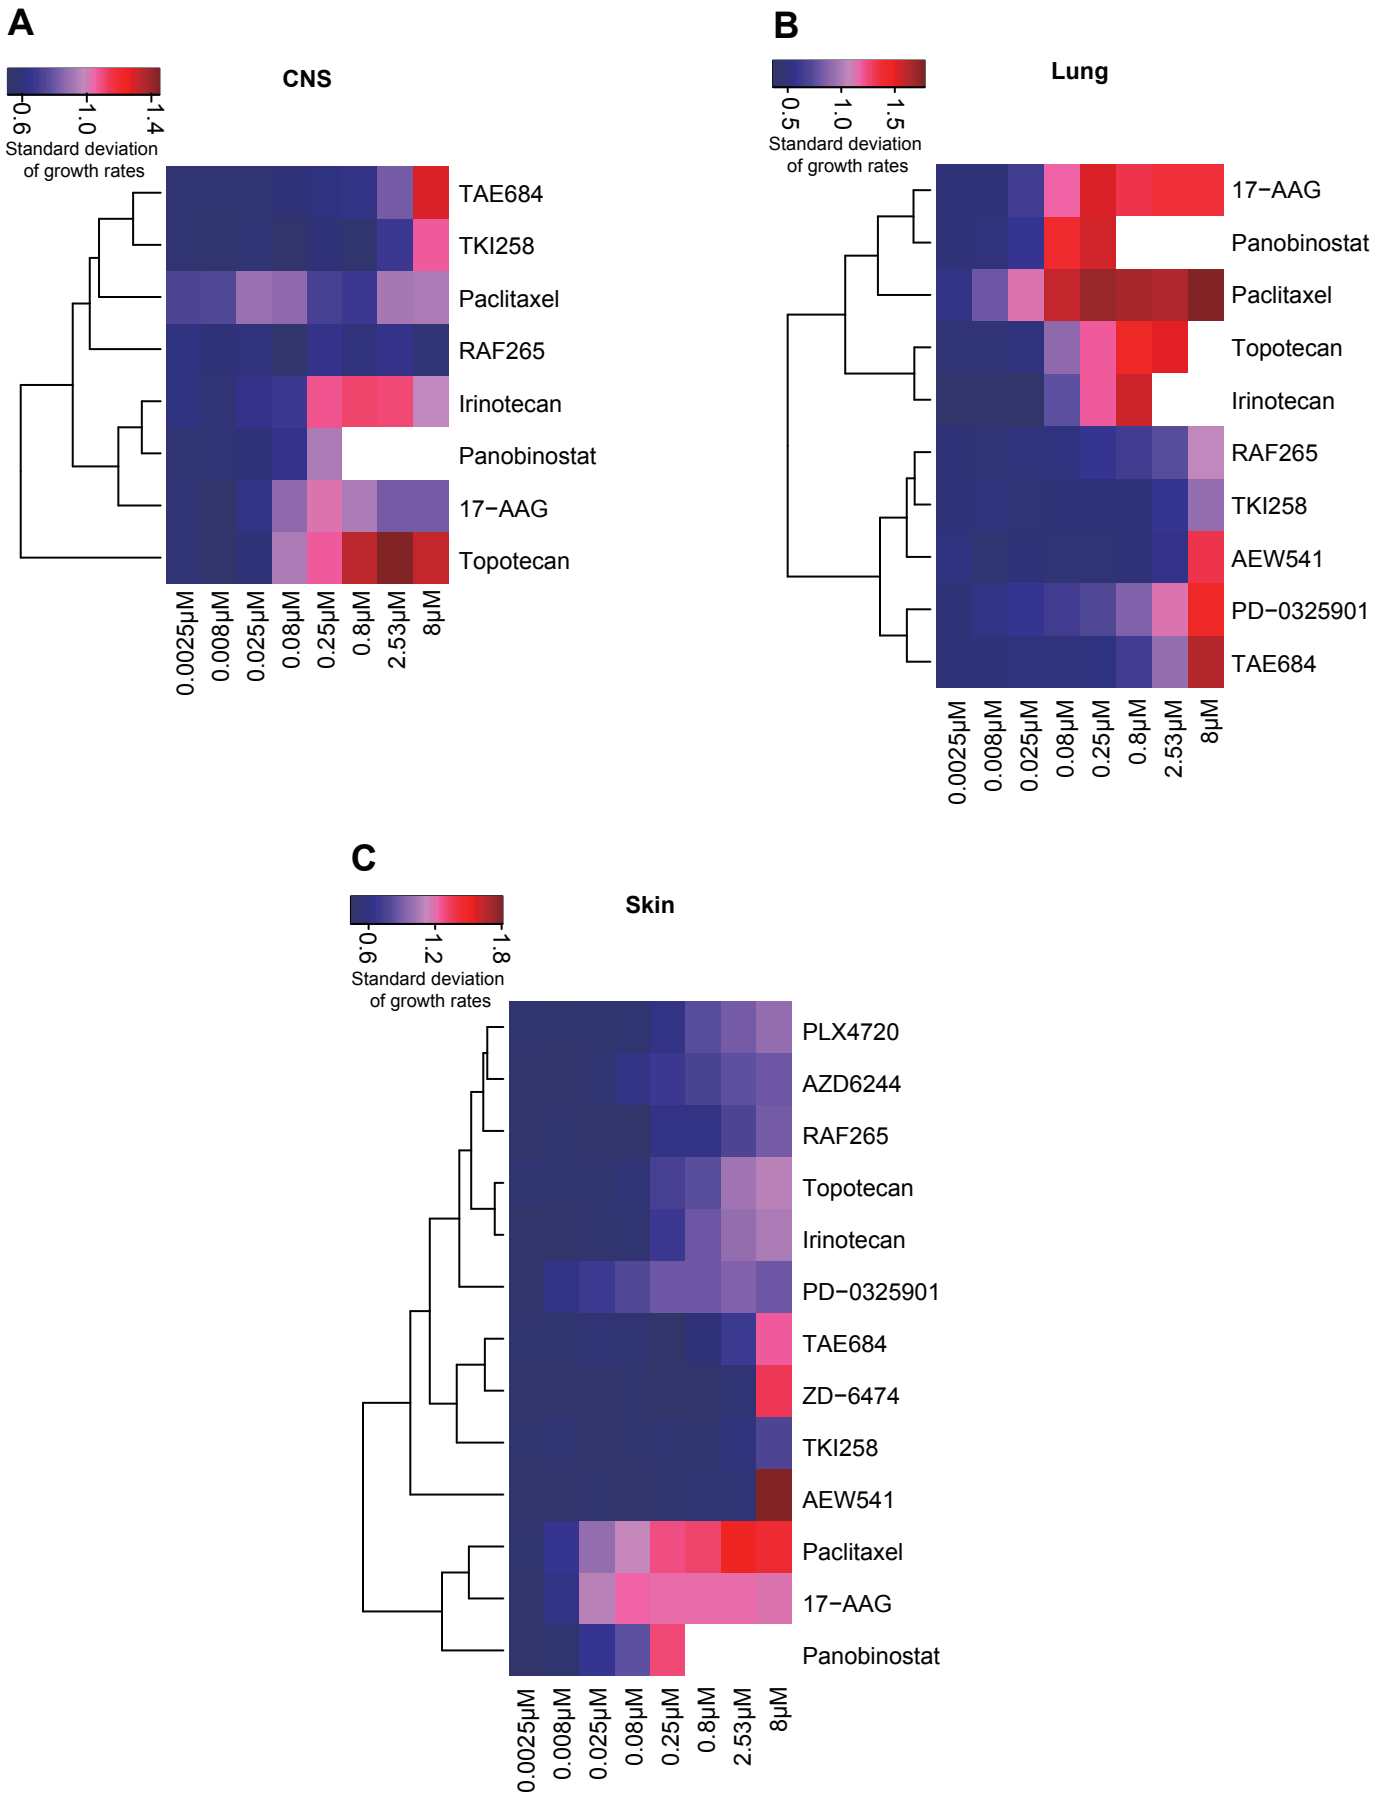

Supplement: NIHMS656944-supplement-3.pdf [file NIHMS656944-supplement-3.pdf]

**Figure S3**

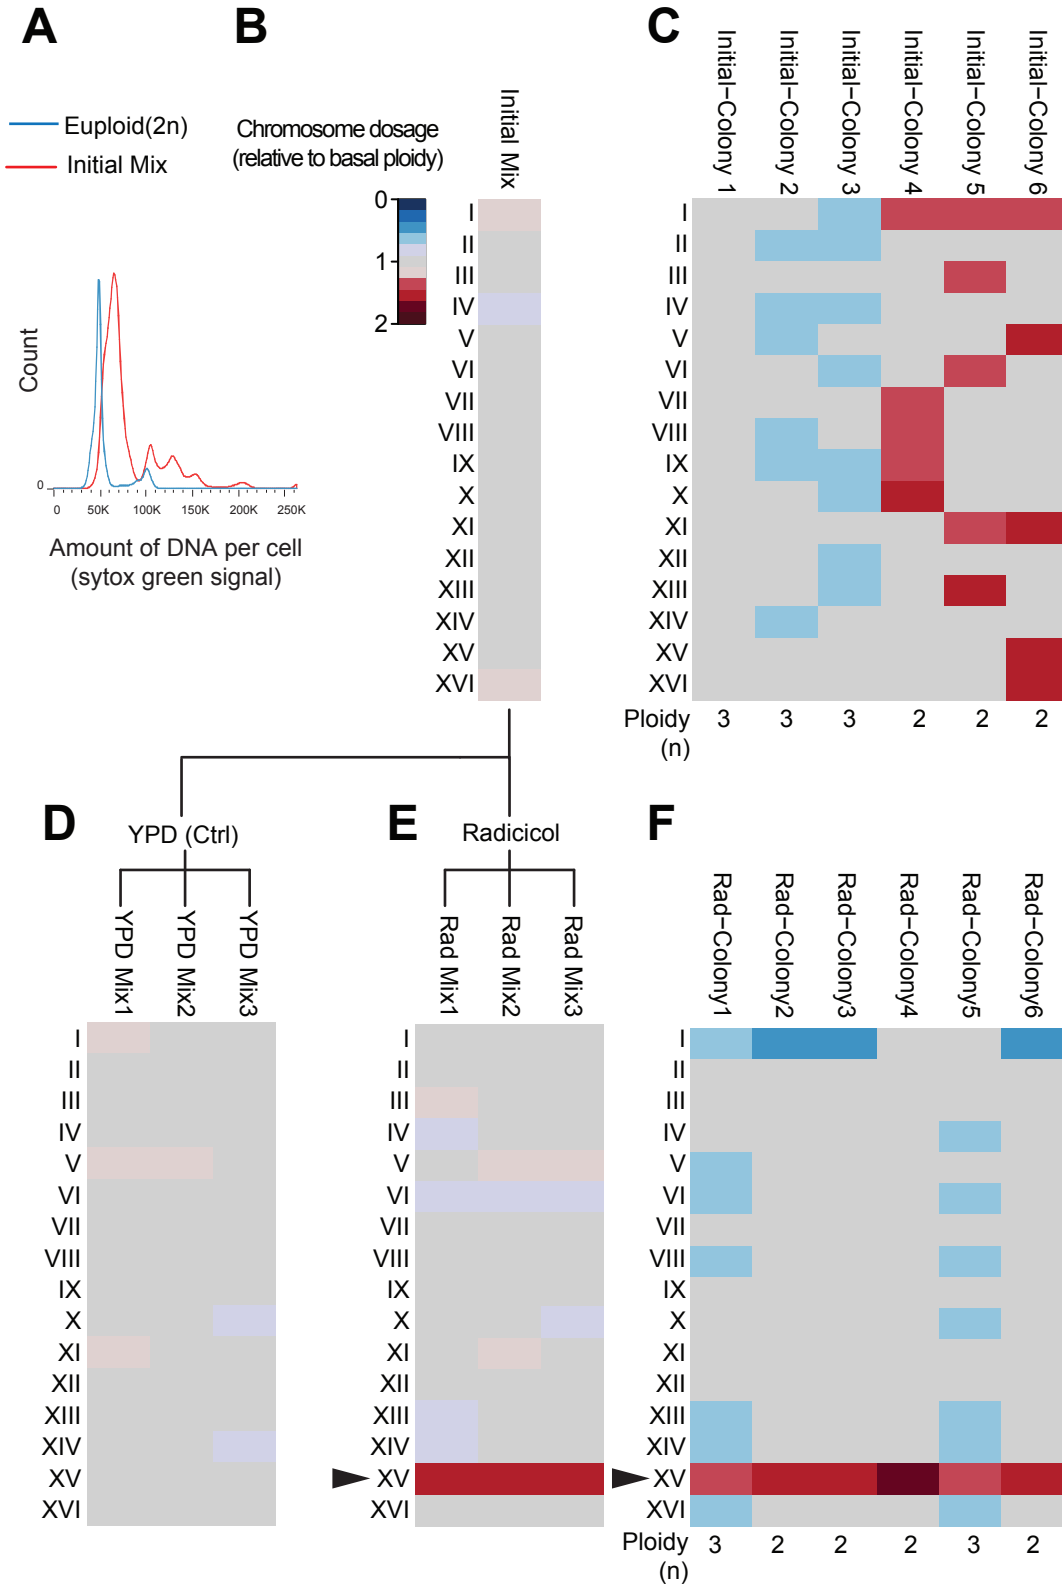

Supplement: NIHMS656944-supplement-4.pdf [file NIHMS656944-supplement-4.pdf]

# Figure S4

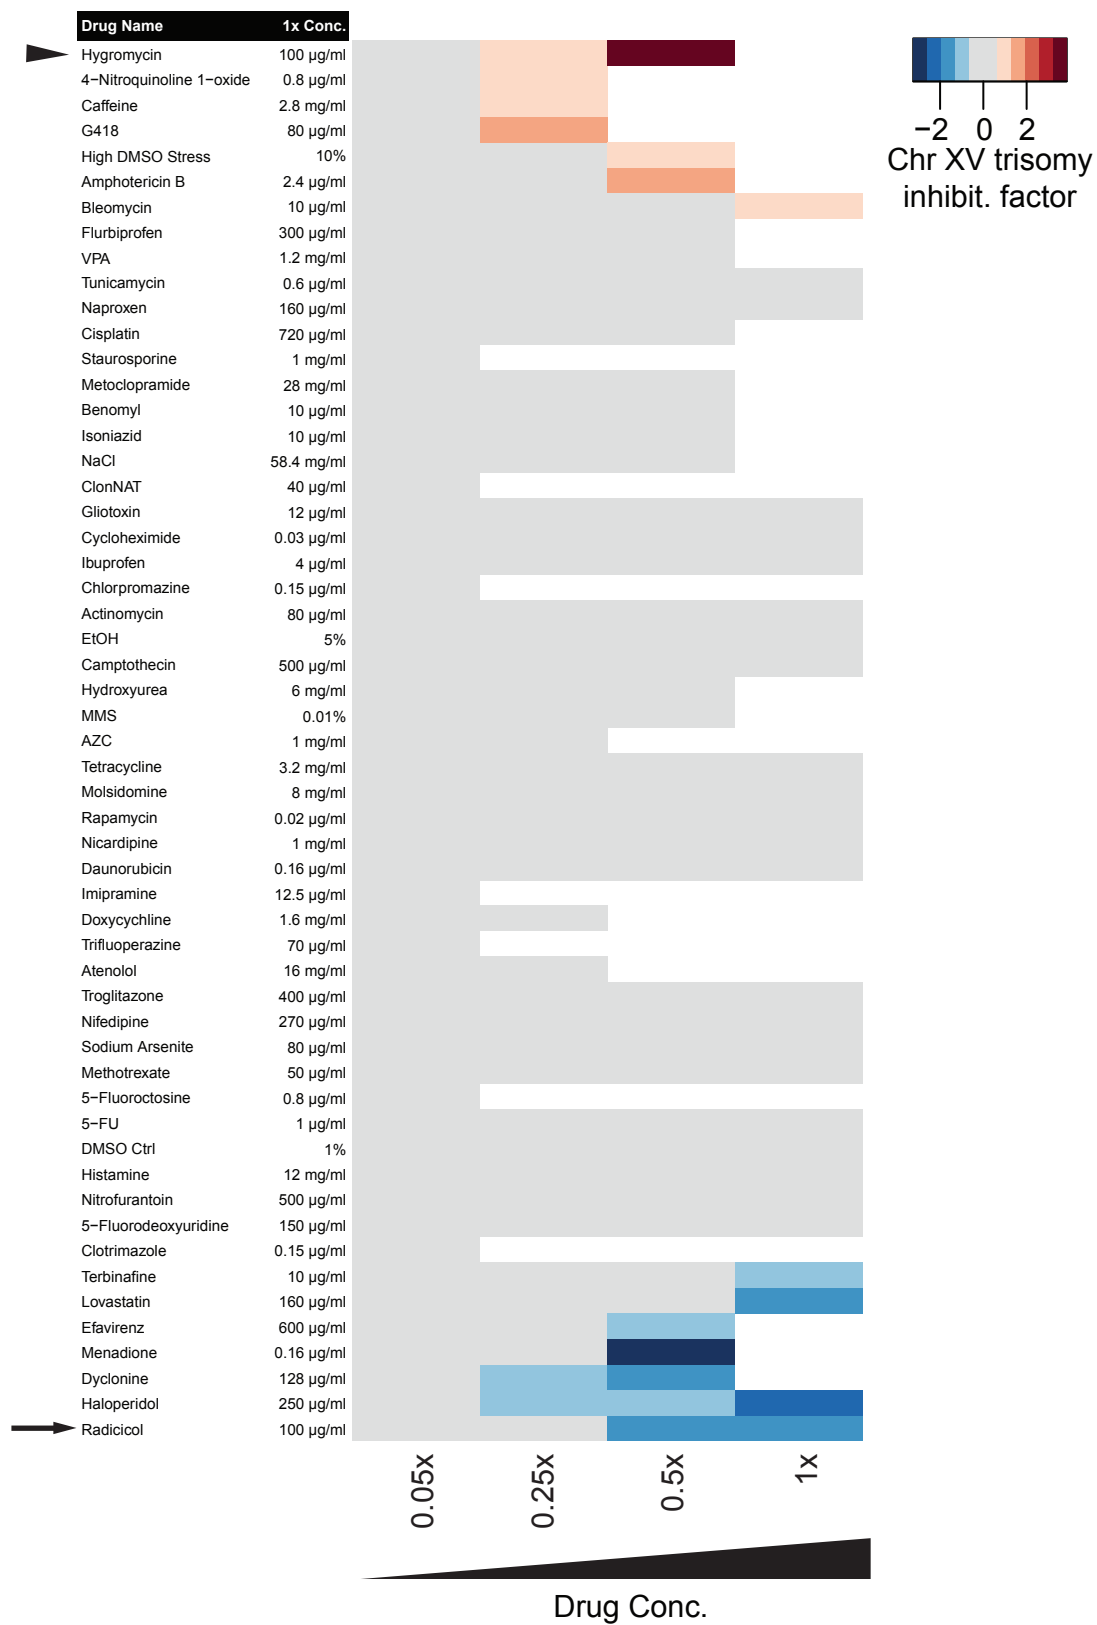

Supplement: NIHMS656944-supplement-5.pdf [file NIHMS656944-supplement-5.pdf]

# Figure S5

## A

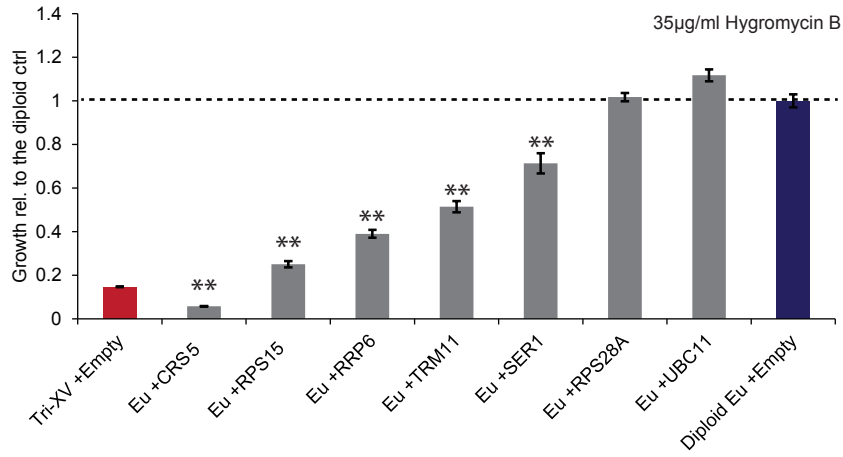

## B

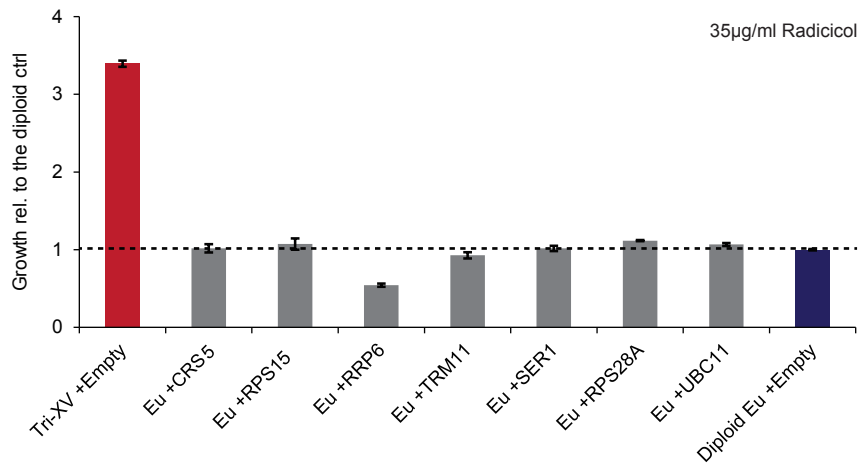

## C

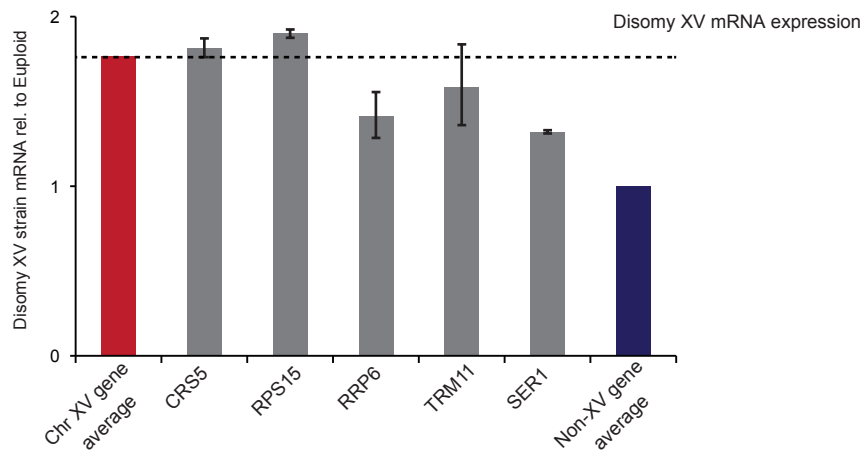

Supplement: NIHMS656944-supplement-6.pdf [file NIHMS656944-supplement-6.pdf]

# Figure S6

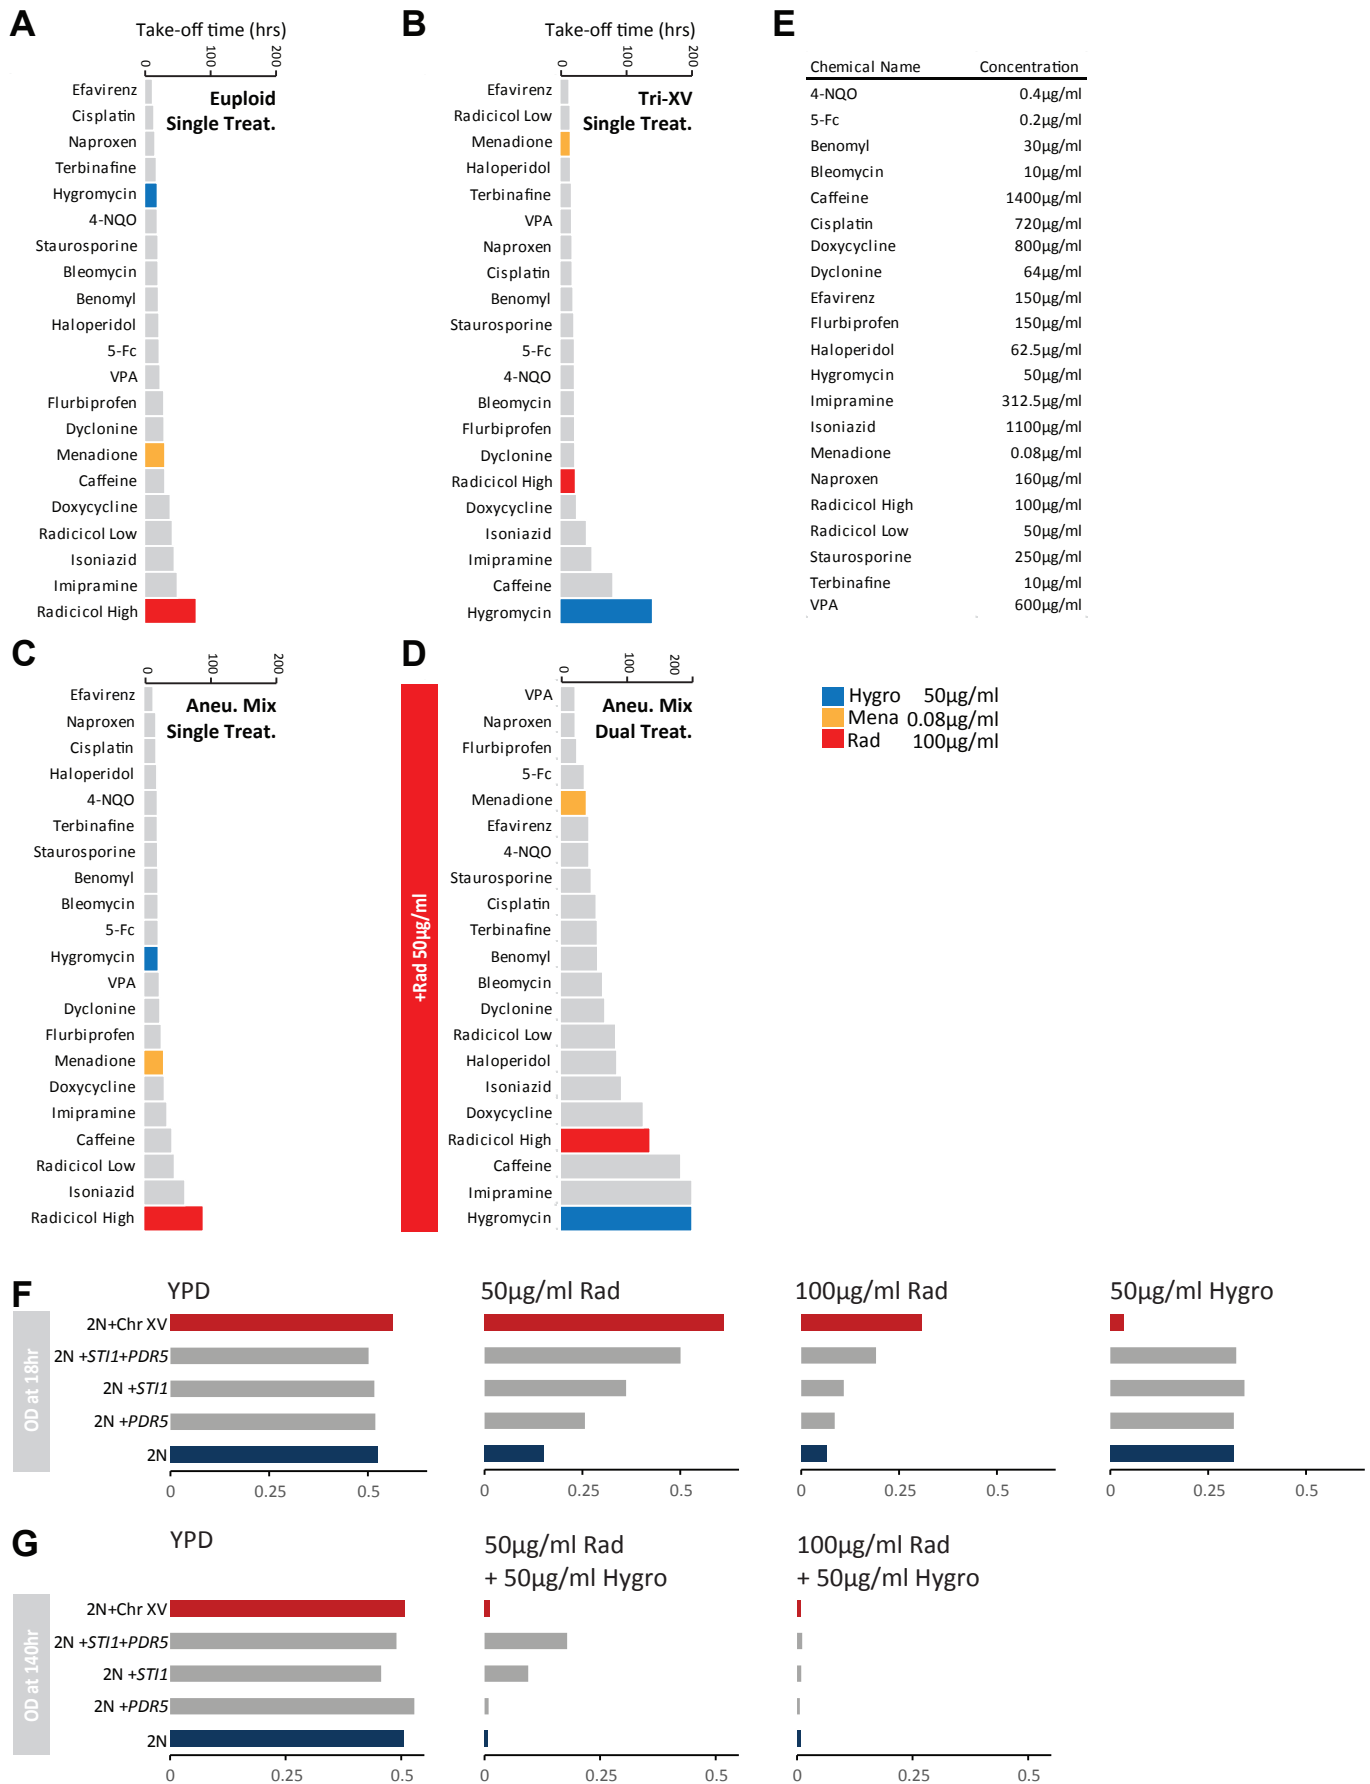

Supplement: NIHMS656944-supplement-7.pdf [file NIHMS656944-supplement-7.pdf]

# Figure S7

## A

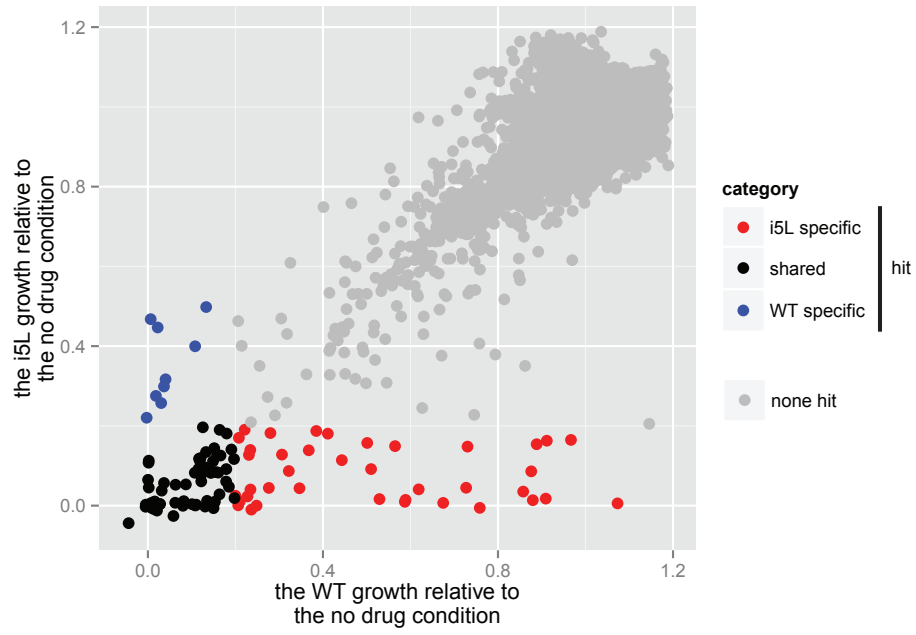

## B

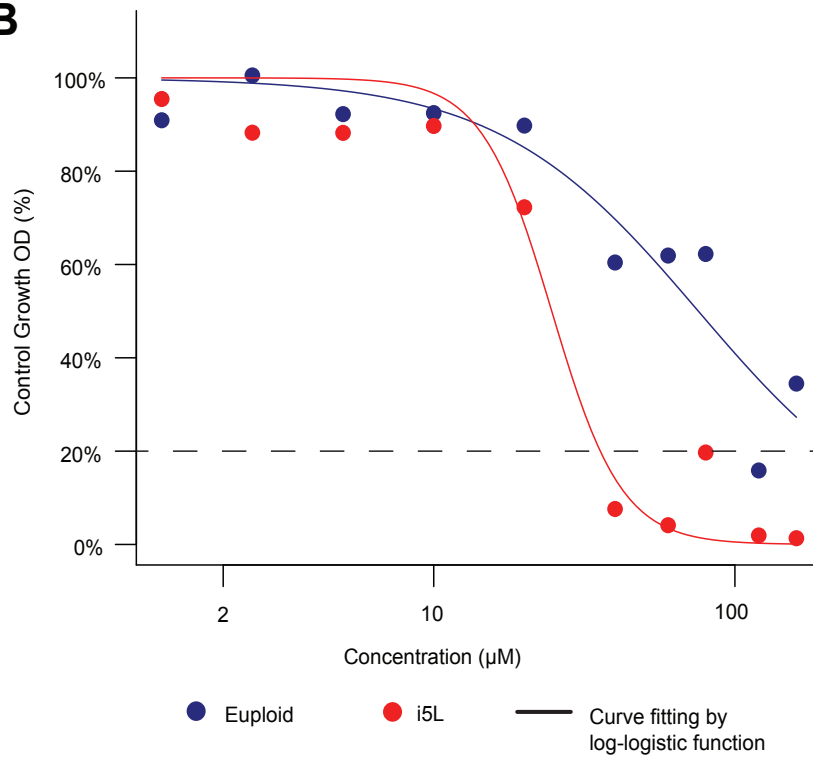

Supplement: NIHMS656944-supplement-8.pdf [file NIHMS656944-supplement-8.pdf]
